# Supplementary material
Source: bioRxiv or medRxiv preprint supplement (https://www.biorxiv.org/highwire/filestream/86441/field_highwire_adjunct_files/12/090795-6.pdf)
Supplement: Supplementary file [file 090795-6.pdf]

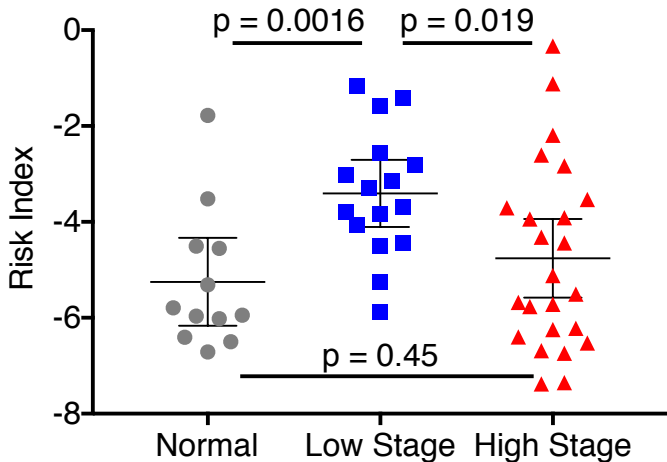

S4 Fig. Column dot plots of the risk indices calculated using a new model designed to separate microbial communities from normal, low stage, and high stage tumors. Normals included in this model and figure are from healthy individuals from an independent study, not from patient matched samples.
